# Supplementary material for: An 11-bp Insertion in Zea mays fatb Reduces the Palmitic Acid Content of Fatty Acids in Maize Grain
Source: PubMed Central journal article supplement (PMC3172307; doi:10.1371/journal.pone.0024699), 2011-09-13
Supplement: pone.0024699.s010.pdf [file pone.0024699.s010.pdf]

**Table S1.** Primers used in this study.

| Name    | BAC      | Genome<br>Position | Gene              | Gene<br>Position | Function Description                                              | Forward                   | Reverse                 |
|---------|----------|--------------------|-------------------|------------------|-------------------------------------------------------------------|---------------------------|-------------------------|
| Li29    | AC195188 | 19854800           | GRMZM2G014240     | 3'               | vacuolar<br>H <sup>+</sup> -pyrophosphatase                       | GGACAAGTGC GACTACGGC      | GCTGCTGGGATATGGGAGA     |
| Li31    | AC195188 | 19854800           | GRMZM2G047138     | 4th exon         | hypothetical protein                                              | TTCGCTCGGTTTCTTTTGC       | GCTGCTCTGCTGCCTCTGA     |
| LB25    | AC195993 | 20682900           |                   | intergenic       |                                                                   | AACGCGGCTCGTGTTATCT       | CGTCATCTGCCCGCTTGG      |
| LB27    | AC195993 | 20682900           | GRMZM2G056256     | 1st intron       | hypothetical protein                                              | GGTGTCGGAGCTGGTATTGG      | ATACACGGCTCATTGGTTCG    |
| LB74    | AC194303 | 21006300           |                   | intergenic       |                                                                   | AATCTTCAGCATCCATGGGG      | CAGTTCAAGCCATCGGTCA     |
| LB77    | AC195890 | 21520800           |                   | intergenic       |                                                                   | CATCCATCGTCGATCAAACC      | AAGAGTTGGTCGTCCATGTGG   |
| LB68    | AC190756 | 21662900           | GRMZM2G398642     | 8th intron       | beta-carotene<br>hydroxylase                                      | GCCGTTTCGTTTCGTTTTCG      | TGCTGATTGGCGTATTTGGAT   |
| LB70    | AC190756 | 21662900           |                   | intergenic       |                                                                   | TTGCCAGCGACCGAGAA         | CTACAGCCACGACGAACAGG    |
| LB78    | AC195882 | 21746200           | GRMZM2G104760     | 2nd intron       | BRASSINOSTEROID<br>INSENSITIVE<br>1-associated receptor<br>kinase | GTCCAATAGCTGCCACCATG      | GGATATGTTGTCATTGGGAAGTC |
| LB67    | AC192170 | 22525300           | GRMZM2G131842     | 5'               | thiol protease SEN102                                             | TAAGCGTTCTCACCCACCAG      | AAAACAATAGCGTACCTTCCATG |
| LB144   | AC209785 | 22971200           | AC211152.4_FGT007 | 5'               | hypothetical protein                                              | CCTTCACGTGGAGAGAGACC      | GACACCGTCCATTTGGTCAT    |
| LB44    | AC198662 | 23348500           |                   | intergenic       |                                                                   | GAGACTGCGGCTGATGCG        | GCCCAGACCTCGTTTTTCG     |
| LB148   | AC206266 | 23544500           | GRMZM2G703580     | 3'               | hypothetical protein                                              | AGTTTTGTCAAATTTTCGAGGA    | AAAGACGCGAGAATGAATGC    |
| LB150   | AC210245 | 23632700           | GRMZM2G122793     | 5'               | ferredoxin-thioredoxin<br>reductase catalytic<br>chain            | AGGATATTGCGCCATAAATAGTA   | TTGTTGGAGTTTTATGTTTGTGC |
| bnlg244 | AC198696 | 23799300           |                   | intergenic       |                                                                   | GATGCTACTACTGGTCTAGTCCAGA | CTCCTCCACTCATCAGCCTTGA  |
| LB152   | AC207360 | 24117800           | AC207360.3_FG001  | 5'               | hypothetical protein                                              | GAATGAATGGACGACGAGAAGA    | GCGTGCGATGGAAGAAGC      |

|          |          |          |               |                          |                                    |                           |                                        |
|----------|----------|----------|---------------|--------------------------|------------------------------------|---------------------------|----------------------------------------|
| LB154    | AC211180 | 24519600 | GRMZM2G102521 | 8th exon                 | solute carrier family 35 member C2 | AGCTAGACGACATGCACTTCC     | TTTGCTGTTTGGAAATTGGA                   |
| bnlg1401 | AC218010 | 24157000 |               | intergenic               |                                    | CACTCGGTTTTTGCTTAGCC      | GTGTCGTCGAGTGCATGC                     |
| LB156    | AC208905 | 24686200 | GRMZM2G028594 | 1st intron               | hypothetical protein               | GCCGCCTATTCACTTCGC        | CTCGTCTCCGCTGCCTCT                     |
| LB52     | AC201977 | 24828300 | GRMZM2G103179 | 2nd intron               | hypothetical protein               | TGAAGGAAGCAATAATCAGAGCG   | TGTGAAGCGGCGAGAAGG                     |
| LB20     | AC190913 | 24960600 | GRMZM2G005522 | 3'                       | transferase                        | ATGTTGCCATTGTAACGGTGAA    | GGAGTTCGGGACGGTGGAG                    |
| LB62     | AC190913 | 24960600 | GRMZM2G005461 | 1st exon                 | ribosomal protein L40              | AAACCAAATTCGTCCACGGG      | AGCCTTGGCGACTCGGG                      |
| LB47     | AC199959 | 25524100 | GRMZM2G077040 | 3'                       | hypothetical protein               | ACCTTACGCATTCGGTAGAGC     | CGGTTATCATCGAGAAAATCCAG                |
| LB59     | AC199959 | 25524100 | GRMZM2G050971 | 1st intron               | iron-sulfur assembly protein IscA  | AAAACCCACCAAAGAACGAT      | GTCTCCACAAGCCAAAACCA                   |
| LB88     | AC193665 | 25965100 | GRMZM2G106683 | 3'                       | zinc carboxy peptidase             | CGTAGGAAAACGATACAACACCC   | TTAATAACAACAAATATGCTGCC                |
| umc1037  | AC193665 | 25965100 |               | intergenic               |                                    | CTTCTTCGTAAAGGCATTTTTGTGC | GTGCGGGATTCTTAGTTTGC                   |
| LB124    | AC204410 | 26161100 | GRMZM2G173615 | 5'                       | hypothetical protein               | ACAAGGCAGGCAGGGTCA        | TCTTCTGGCAGTGCTCGTAGTA                 |
| LB296    | AC204410 | 26161100 | GRMZM2G173615 | 1st exon                 | POAL Cysteine-rich peptide         | GCAGAGGTCCGGTAAACATC      | TGGCAGTGCTCGTAGTAGGA                   |
| LB262    | AC204410 | 26161100 | GRMZM2G000645 | 11th intron              | coatamer complex subunit           | ATCGGCACTGGCAAATAAAA      | GGCCACAGATGGAGAAAGAT                   |
| LD64     | AC218168 | 26234600 | FatB          | 5'                       | Acyl-ACP thioesterase              | TTGCCGCCCTCCAAAACCT       | GGCTTCCAGAACCGTGATA                    |
| LB266    | AC218168 | 26234600 | FatB          | 2nd intron               | Acyl-ACP thioesterase              | TCAGCCATAACAGACGAGCA      | GCATTTGGCAACAATCACGA                   |
| LB267    | AC218168 | 26234600 | FatB          | 4th intron               | Acyl-ACP thioesterase              | GCCCGAATCCCTTTTCATTTA     | CACGACGTTGTAAAACGACCGCGTG<br>GCCGTCCAT |
| LD42     | AC218168 | 26234600 | FatB          | 6th exon                 | Acyl-ACP thioesterase              | CGGGGCCGACATAGTGAA        | CAAACCTTCTGCGTTAGCATACC                |
| LB268    | AC218168 | 26234600 | FatB          | 3'                       | Acyl-ACP thioesterase              | TCGAATCGCACACCTCCTG       | GCAAAGCAAGCCAACCG                      |
|          |          |          |               | downstream<br>intergenic |                                    |                           |                                        |
| LB131    | AC205291 | 26376700 | GRMZM2G404897 | 3'                       | zinc finger protein                | TCCCACTTTTTAGGCCAGA       | CGATCACCATGGTCCCTACT                   |

|         |          |          |                  |             |                                                     |                            |                          |
|---------|----------|----------|------------------|-------------|-----------------------------------------------------|----------------------------|--------------------------|
| LB97    | AC197529 | 26646200 | GRMZM2G377199    | 5'          | lectin protein kinase,<br>putative, expressed       | CAACCGCAGAGTACAAGTTACAGGG  | CCTTGTACGTCGTTGCGCC      |
| LB157   | AC210692 | 26950000 | GRMZM2G018849    | 3'          | hypothetical protein                                | AAATTGGATGGATGGGAAATC      | ACAGCCTAAACAACAACAGAAGTG |
| LB92    | AC189054 | 27454700 | GRMZM2G447455    | 5'          | Kinesin-II 85 kDa<br>subunit, putative              | CTCGCACGTCGCACCTCCT        | CGTGCAGCCGCTAGGATCG      |
| LB96    | AC193668 | 27582100 | GRMZM2G449056    | 3'          | transcription factor<br>Myb2                        | CGTTGTTTCTGCCTGATTTC       | GGCGACCTGGACTACTGGCT     |
| LB95    | AC193668 | 27582100 | AC193668.3_FG006 | 7th intron  | hypothetical protein                                | ACAGCCATGCTTCAC            | GCTGCCATTACTGATA         |
| umc2213 | AC214663 | 27650700 |                  | intergenic  |                                                     | TGATTTGATCCATTACCATCCTATTC | TGCGTGTGTCTGTCTGTCTGTTAT |
| LB158   | AC210041 | 27876100 | AC210041.3_FG002 | 2nd intron  | aminomethyltransferase                              | CTCCTAGCAGTGAGTTCCGTGAT    | AGACAGACTGATGGTCATTTTCG  |
| LB159   | AC211662 | 27993700 | GRMZM2G398341    | 15th intron | phosphatidylinositol<br>kinase                      | TCTTTACAGGGATTGGGTCA       | CTAGTCGCGGCTGACCTCT      |
| LB18    | AC190908 | 28753200 | GRMZM2G404603    | 5'          | hypothetical protein                                | ACCCCTCTGCCGATTTCC         | TCCTGCCTCGGCGTTG         |
| LD17    | AC190908 | 28753200 | GRMZM2G024993    | 3rd intron  | granule-bound starch<br>synthase precursor          | ACAAGGACGCCTGGGACA         | GGAACAGTGGGTGGTCAA       |
| LB194   | AC204379 | 28954100 | GRMZM2G171395    | 2nd intron  | NAM protein                                         | GGCCACGAGGAACACGA          | CCGGCCATTTCCAACAAC       |
| LB6     | AC189782 | 29125600 | GRMZM2G121333    | 3rd exon    | valacyclovir hydrolase                              | GCACCGCATTGTATTTGGAT       | TGAGCGTGGAGGCATAGGAG     |
| LB188   | AC211766 | 29365700 | GRMZM2G118687    | 5th exon    | peptidyl-prolyl<br>cis-trans isomerase-like         | TTTTCGGTTGATGATTTGGT       | GCTGCTTGGCGTAGGTG        |
| LB46    | AC192201 | 29968400 | GRMZM2G467992    | 1st intron  | plasma membrane<br>H <sup>+</sup> -ATPase subunit H | AAGTTGGAGGATGATTGC         | AGGATGTAAAGGGGAAGA       |
| LB177   | AC207551 | 30821000 | GRMZM2G071602    | 5th exon    | protein binding protein                             | GCCCAGGTGGTGTAAAGGT        | CATCAAAAACGAAGAGGACGAG   |
| LB196   | AC202398 | 31203200 | GRMZM2G383540    | 3rd intron  | DAG protein                                         | AACGGCATAACGAAACAGCAT      | GGTCTAGCAAATTGGATGGGT    |
| LB198   | AC189077 | 31551100 | GRMZM2G083716    | 3rd intron  | CPN60B                                              | AGTGCTGGCGGTTCCC           | GGCCTGCAAACTTGTATGA      |
| LB169   | AC210074 | 32060700 | GRMZM2G093291    | 5'          | pentatricopeptide<br>(PPR)                          | GGAAGGGAAGCGAGATAAGG       | GATCCCCTCACTTGTGGCTA     |

|                                               |          |          |               |                           |                                   |                                     |  |                        |
|-----------------------------------------------|----------|----------|---------------|---------------------------|-----------------------------------|-------------------------------------|--|------------------------|
|                                               |          |          |               |                           | repeat-containing<br>protein-like |                                     |  |                        |
| LB166                                         | AC210296 | 32658500 |               | intergenic                |                                   | GAGATTCCTGTGCCAGCTTC                |  | GAGCGGAGAGGTACCAACAG   |
| LB183                                         | AC195601 | 33878600 | GRMZM2G153792 | 10th exon                 | acetyl-CoA synthetase             | CGAAAGCCGTCACC                      |  | CACTCACGACCTGTTGTCTCCT |
| LB171                                         | AC206582 | 34084400 | GRMZM2G052389 | 9th exon                  | acyl-CoA oxidase                  | ATTCCTGAAGCTCCATTCCA                |  | AAGCCCACTGCTGTTCAAGT   |
| <b>RT-PCR primers</b>                         |          |          |               |                           |                                   |                                     |  |                        |
| LD48                                          | AC218168 | 26234600 | FatB          | RT-PCR                    | Acyl-ACP thioesterase             | CGATACCCTACATTGCTCCC                |  | CGAATCCAGAAGTTTTGCCTA  |
| <b>Primers used in prokaryotic expression</b> |          |          |               |                           |                                   |                                     |  |                        |
| FatBF                                         | AC218168 | 26234600 | FatB          | Prokaryotic<br>expression | Acyl-ACP thioesterase             | GAGCTC<br>GAAGCACGGTCGAGCCATGGCTGGC |  |                        |
| FatBR                                         | AC218168 | 26234600 | FatB          | Prokaryotic<br>expression | Acyl-ACP thioesterase             | TCTAGA ATGCCTCCAAGCCTCCC            |  |                        |
| I73                                           | AC218168 | 26234600 | FatB          | Prokaryotic<br>expression | Acyl-ACP thioesterase             | TCTAGA<br>GGTCATTCATGCATTCTCGG      |  |                        |
| <b>Sequence Primers</b>                       |          |          |               |                           |                                   |                                     |  |                        |
| LD49F/<br>LD51R                               | AC218168 | 26234600 | FatB          | Sequencing                | Acyl-ACP thioesterase             | ACTTCTGGATTCCGGTCCTATG              |  | AAGATTGTGCGTCCAGAGTTT  |
| LD63F/<br>LD49R                               | AC218168 | 26234600 | FatB          | Sequencing                | Acyl-ACP thioesterase             | TCTAGAGGCTTCTTTGAATCCCACA           |  | TCAAGTTTCGTTTGCTCATCT  |
| FatB7                                         | AC218168 | 26234600 | FatB          | Sequencing                | Acyl-ACP thioesterase             | ACGCGTTTCTGTTCATAGCC                |  | GCCAAGTTCTTTGATGTTTTGG |
| FatB2                                         | AC218168 | 26234600 | FatB          | Sequencing                | Acyl-ACP thioesterase             | GGGAGATACTGTTCAAGTGGAC              |  | CATGCATGATGCTCAGCTCTA  |

---
