# Supplementary material for: An 11-bp Insertion in Zea mays fatb Reduces the Palmitic Acid Content of Fatty Acids in Maize Grain
Source: PubMed Central journal article supplement (PMC3172307; doi:10.1371/journal.pone.0024699), 2011-09-13
Supplement: pone.0024699.s015.pdf [file pone.0024699.s015.pdf]

**Table S6.** Associations between palmitic acid related traits and polymorphism sites of *Zmfatb* at three environments in CAM155.

| Site   | Features     |          | Environments | 2006 Beijing |                  | 2007 Beijing      |          | 2007 Hainan |          | $R^2$ (%) | $P$ Value |
|--------|--------------|----------|--------------|--------------|------------------|-------------------|----------|-------------|----------|-----------|-----------|
|        |              |          |              | Traits       | ALL <sup>a</sup> | EHOL <sup>b</sup> | ALL      | EHOL        | ALL      | EHOL      | 2007HN    |
| S_752  | Location     | promoter | C16:0        | 1.50E-04     | n.s.             | 1.30E-03          | n.s.     | 1.43E-04    | n.s.     | 11        | 3.00E-04  |
|        | Genotype     | C/G      | C16:0/ALL    | 4.03E-05     | 7.49E-04         | 1.30E-03          | 7.56E-04 | 1.38E-04    | 3.90E-03 | 13        | 6.60E-05  |
|        | Frequency(%) | 36/64    | SFA/ALL      | 2.64E-04     | 2.80E-03         | 5.60E-03          | 3.87E-04 | 1.28E-04    | 2.20E-03 | 15        | 1.38E-05  |
|        | AA Change    | no       | UFA/ALL      | 5.19E-04     | 4.60E-03         | 5.60E-03          | 3.87E-04 | 1.51E-04    | 2.30E-03 | 15        | 1.66E-05  |
|        |              |          | SFA/UFA      | 5.43E-04     | 3.60E-03         | 7.90E-03          | 4.59E-04 | 2.58E-04    | 2.60E-03 | 13        | 1.08E-04  |
| S_768  | Location     | promoter | C16:0        | 4.23E-04     | n.s.             | 5.00E-03          | n.s.     | 6.73E-04    | n.s.     | 15        | 7.54E-05  |
|        | Genotype     | 2/4/0    | C16:0/ALL    | 1.68E-04     | 2.40E-03         | 5.60E-03          | 3.20E-03 | 4.44E-04    | 2.00E-03 | 22        | 7.73E-07  |
|        | Frequency(%) | 40/35/25 | SFA/ALL      | 1.30E-03     | 1.01E-02         | n.s.              | 2.30E-03 | 4.11E-04    | 7.74E-04 | 24        | 2.58E-07  |
|        | AA Change    | no       | UFA/ALL      | 2.20E-03     | 1.63E-02         | n.s.              | 2.30E-03 | 5.08E-04    | 9.34E-04 | 23        | 3.49E-07  |
|        |              |          | SFA/UFA      | 2.20E-03     | 1.63E-02         | n.s.              | 2.30E-03 | 5.08E-04    | 9.34E-04 | 23        | 3.49E-07  |
| S_4294 | Location     | exon6    | C16:0        | 2.50E-06     | 1.20E-05         | 3.14E-05          | 3.53E-05 | 3.09E-06    | 5.55E-05 | 11        | 1.11E-03  |
|        | Genotype     | 0/11     | C16:0/ALL    | 2.09E-09     | 1.07E-07         | 1.10E-08          | 8.71E-09 | 4.69E-09    | 1.66E-07 | 25        | 1.47E-07  |
|        | Frequency(%) | 32/68    | SFA/ALL      | 2.94E-07     | 1.01E-05         | 6.87E-07          | 3.72E-08 | 2.17E-08    | 1.30E-06 | 27        | 6.47E-08  |
|        | AA Change    | yes      | UFA/ALL      | 7.96E-06     | 7.78E-05         | 6.87E-07          | 3.72E-08 | 2.91E-08    | 1.62E-06 | 26        | 8.00E-08  |
|        |              |          | SFA/UFA      | 7.96E-06     | 7.78E-05         | 6.87E-07          | 3.72E-08 | 5.22E-08    | 1.62E-06 | 23        | 8.00E-08  |

<sup>a</sup> includes 155 elite inbred lines in the Chinese Association Mapping Panel (CAM155). <sup>b</sup> excludes the 34 high-oil lines from the Chinese Association Mapping Panel (CAM155). The abbreviations of traits can be found in Table S2.
