# Supplementary material for: An 11-bp Insertion in Zea mays fatb Reduces the Palmitic Acid Content of Fatty Acids in Maize Grain
Source: PubMed Central journal article supplement (PMC3172307; doi:10.1371/journal.pone.0024699), 2011-09-13
Supplement: pone.0024699.s018.pdf [file pone.0024699.s018.pdf]

**Table S9.** Information for elite inbred lines selected for the gene effect validation of *Zmfatb*.

| Inbred lines | Pedigree  | Genotype | C16:0 (mg/g) | C16:0/ALL (%) |
|--------------|-----------|----------|--------------|---------------|
| By815        | BHO       | -/-      | 11.12        | 9.64          |
| By813        | BHO       | -/-      | 11.23        | 9.17          |
| By804        | BHO       | +/+      | 16.47        | 13.23         |
| By4839       | BHO       | +/+      | 16.61        | 14.56         |
| 4F1          | Lancaster | -/-      | 4.91         | 13.81         |
| Mo17         | Lancaster | -/-      | 5.26         | 13.85         |
| Ji63         | Lancaster | +/+      | 7.60         | 18.05         |
| Ji53         | Lancaster | +/+      | 7.61         | 15.28         |
| Shen5003     | Reid      | -/-      | 4.67         | 14.45         |
| B73          | Reid      | -/-      | 5.07         | 13.89         |
| 832          | Reid      | +/+      | 7.11         | 14.76         |
| U8112        | Reid      | +/+      | 7.78         | 15.47         |
| K10          | RHO       | -/-      | 4.49         | 12.98         |
| 7884-4Ht     | RHO       | -/-      | 5.06         | 12.65         |
| Ry697        | RHO       | +/+      | 12.58        | 14.97         |
| Sy1035       | RHO       | +/+      | 12.74        | 13.59         |

-/- and +/+ is the homozygous allele of B73 and By804 based on the 11-bp InDel, respectively; BHO is the Beijing high-oil lines; Lancaster and Reid is the Lancaster and Reid heterotic group, respectively; RHO represents the high-oil population from Reid heterotic group.
